# Supplementary material for: Diurnal Variation in Cloud and Precipitation Characteristics in Summer over the Tibetan Plateau and Sichuan Basin
Source: MDPI journal article supplement (doi:10.3390/rs14112711), 2022-06-05
Supplement: s1 [file s1]

Supplementary Material:

Table S1: The information of ground meteorological observation sites of China Meteorological Administration.

| Station name | Altitude (°) | Longitude (°) | Elevation (m) |
|--------------|--------------|---------------|---------------|
| Naqu         | 31.5         | 92.1          | 4508.0        |
| Dangxiong    | 30.5         | 91.1          | 4201.1        |
| Zedang       | 29.3         | 91.8          | 3553.2        |
| Tuotuohe     | 34.2         | 92.4          | 4534.3        |
| Zaduo        | 32.9         | 95.3          | 4068.5        |
| Qumalai      | 34.1         | 95.8          | 4176.4        |
| Yushu        | 33.0         | 97.0          | 3682.2        |
| Maduo        | 34.9         | 98.2          | 4273.3        |
| Qingshuihe   | 33.8         | 97.1          | 4417.5        |
| Shiqu        | 33.0         | 98.1          | 4201.0        |
| Guoluo       | 34.5         | 100.2         | 3720.0        |
| Dari         | 33.8         | 99.7          | 3968.5        |
| Henan        | 34.7         | 101.6         | 3501.0        |
| Jiuzhi       | 33.4         | 101.5         | 3630.0        |
| Maqu         | 34.0         | 102.1         | 3473.2        |
| Ruoergai     | 33.6         | 103.0         | 3441.1        |
| Hezuo        | 35.0         | 102.9         | 2910.5        |
| Minxian      | 34.4         | 104.0         | 2315.8        |
| Wudou        | 33.4         | 104.9         | 1081.7        |
| Dingqing     | 31.4         | 95.6          | 3874.0        |
| Nangqian     | 32.2         | 96.5          | 3645.0        |
| Changdu      | 31.2         | 97.2          | 3307.1        |
| Dege         | 31.8         | 98.6          | 3199.3        |
| Ganzi        | 31.6         | 100.0         | 3394.2        |
| Banma        | 32.9         | 100.8         | 3530.0        |

|             |      |       |        |
|-------------|------|-------|--------|
| Seda        | 32.3 | 100.3 | 3895.8 |
| Daofu       | 31.0 | 101.1 | 3008.6 |
| Maerkang    | 31.9 | 102.2 | 2665.9 |
| Hongyuan    | 32.8 | 102.6 | 3492.7 |
| Xiaojin     | 31.0 | 102.4 | 2368.6 |
| Songpan     | 32.7 | 103.6 | 2852.1 |
| Doujiangyan | 31.0 | 103.7 | 707.0  |
| Bomi        | 29.9 | 95.8  | 2737.0 |
| Batang      | 30.0 | 99.1  | 2589.1 |
| Xinlong     | 30.9 | 100.3 | 2999.2 |
| Litang      | 30.0 | 100.3 | 3950.5 |
| Tianquan    | 30.1 | 102.8 | 818.7  |
| Pujiang     | 30.2 | 103.5 | 578.4  |
| Linzhi      | 29.7 | 94.3  | 3001.0 |
| Daocheng    | 29.1 | 100.3 | 3728.6 |
| Kangding    | 30.1 | 102.0 | 2615.5 |
| Emeishan    | 29.5 | 103.3 | 3048.6 |
| Leshan      | 29.6 | 103.8 | 422.1  |
| Chayu       | 28.7 | 97.5  | 2331.2 |
| Deqin       | 28.5 | 98.9  | 3488.0 |
| Jiulong     | 29.0 | 101.5 | 2993.7 |
| Yuexi       | 28.7 | 102.5 | 1660.1 |
| Leibo       | 28.3 | 103.6 | 253.9  |
| Yibing      | 28.8 | 104.6 | 502.8  |
| Gaoxian     | 28.4 | 104.5 | 378.1  |
| Tianshui    | 34.6 | 105.8 | 1142.6 |
| Baoji       | 34.4 | 107.1 | 610.3  |
| Wugong      | 34.3 | 108.2 | 449.1  |
| Yaozhou     | 35.0 | 109.0 | 723.3  |

|            |      |       |        |
|------------|------|-------|--------|
| Lueyang    | 33.3 | 106.2 | 797.3  |
| Hanzhong   | 33.1 | 107.0 | 509.3  |
| Foping     | 33.5 | 108.0 | 1088.6 |
| Shangzhou  | 33.9 | 110.0 | 747.2  |
| Zhenan     | 33.4 | 109.2 | 693.6  |
| Shiquan    | 33.1 | 108.3 | 485.0  |
| Wanyuan    | 32.1 | 108.0 | 674.0  |
| Ankang     | 32.7 | 109.0 | 291.2  |
| Langzhong  | 31.6 | 106.0 | 385.4  |
| Bazhong    | 31.9 | 107.8 | 360.0  |
| Dazhuan    | 31.2 | 107.5 | 344.3  |
| Fengjie    | 31.0 | 109.5 | 608.3  |
| Suining    | 30.5 | 105.6 | 279.5  |
| Tongnan    | 30.2 | 105.8 | 331.7  |
| Nanchong   | 30.8 | 106.1 | 309.7  |
| Wanxianshi | 30.8 | 108.4 | 188.8  |
| Exi        | 30.3 | 109.5 | 458.0  |
| Chongqing  | 29.6 | 106.5 | 260.4  |
| Xuanen     | 30.0 | 109.5 | 571.8  |
| Laifeng    | 29.5 | 109.4 | 460.4  |
| Tongzi     | 28.1 | 106.8 | 972.0  |
| Xuyong     | 28.2 | 105.4 | 379.2  |
| Mouyang    | 28.8 | 108.8 | 665.8  |
| Jishou     | 28.2 | 109.7 | 204.4  |

Table S2: The information of radiosonde stations of China Meteorological Administration.

| Station name | Altitude (°) | Longitude (°) | Elevation(m) |
|--------------|--------------|---------------|--------------|
| Naqu         | 31.4         | 92.0          | 4507.0       |
| Linzhi       | 29.6         | 94.3          | 2991.8       |

|           |      |       |        |
|-----------|------|-------|--------|
| Yushu     | 33.0 | 96.9  | 3716.9 |
| Changdu   | 31.1 | 97.1  | 3315.0 |
| Batang    | 30.0 | 99.1  | 2589.2 |
| Ganzi     | 31.6 | 100.0 | 3393.5 |
| Hongyuan  | 32.8 | 102.5 | 3491.6 |
| Wenjiang  | 30.7 | 103.8 | 547.7  |
| Wudou     | 33.4 | 104.9 | 1079.1 |
| Hanzhong  | 33.0 | 107.0 | 509.5  |
| Daxian    | 31.2 | 107.5 | 344.9  |
| Shapingba | 29.5 | 106.4 | 259.1  |
| Ankang    | 32.7 | 109.0 | 290.8  |
| Yibing    | 28.7 | 104.5 | 287.0  |

---

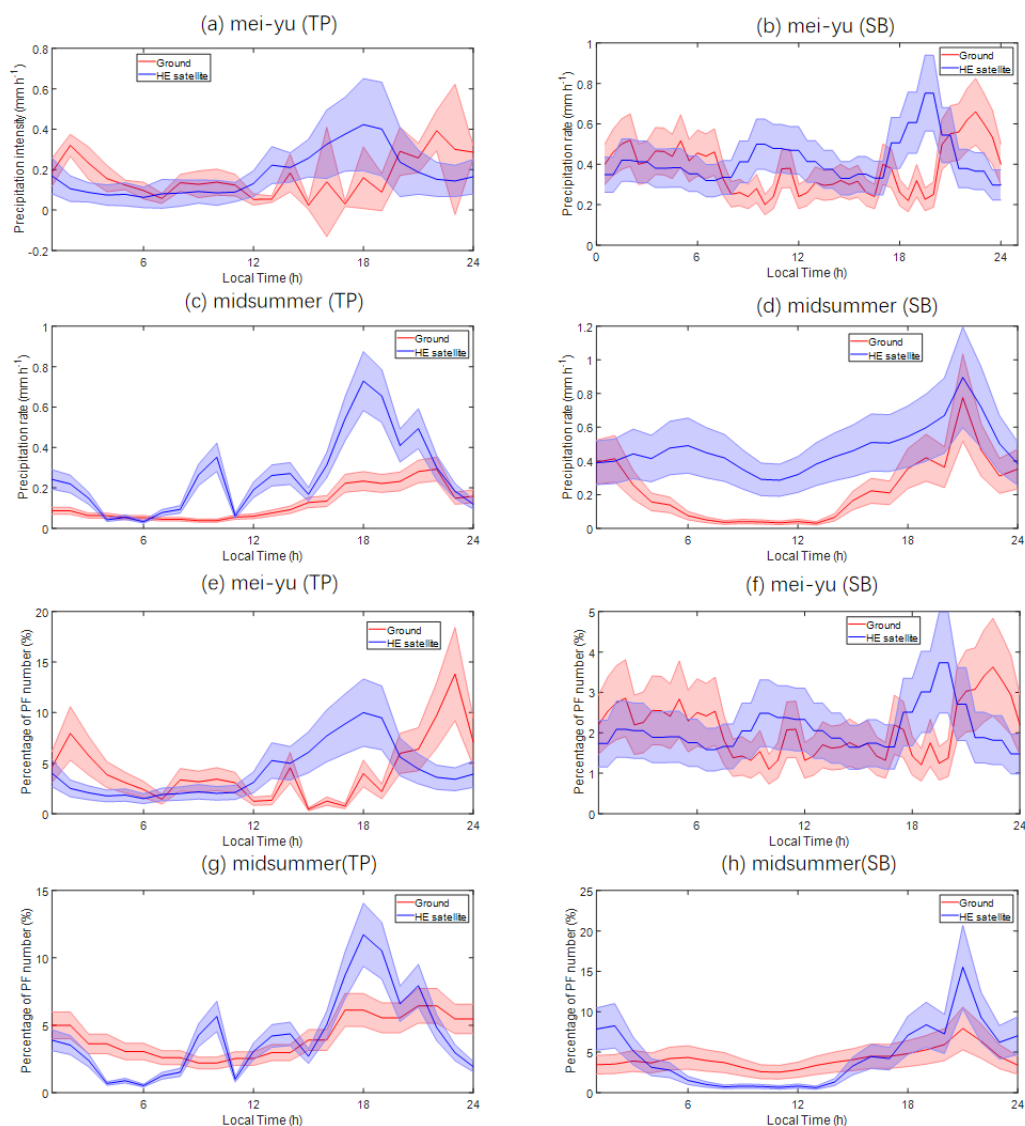

Figure S1: The precipitation from Hydro Estimator satellite estimates (blue line) and ground observations (red line) during (a, b) mei-yu and (c, d) midsummer period over the (a, c) Tibetan Plateau and (b, d) Sichuan Basin. Blue shaded area is the standard error of precipitation from Hydro Estimator satellite estimates and red shaded area is the standard error of precipitation from ground observations. The percentage of precipitation feature number during (e, f) mei-yu and (g, h) midsummer period over the (e, g) Tibetan Plateau and (f, h) Sichuan Basin and their error bar. Blue shaded area is the standard error of the percentage of precipitation feature from Hydro Estimator satellite estimates and red shaded area is the standard error of percentage of precipitation feature from ground observations.

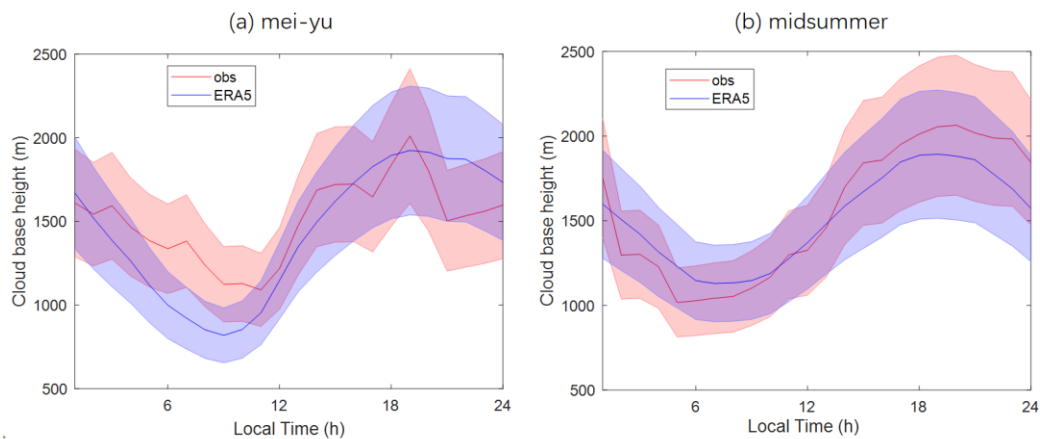

Figure S2: The comparison of cloud base height from ERA5 dataset (blue line) and cloud radar observations (red line) and their standard error (blue shaded area for ERA5 and red shaded area for observations) during the (a) mei-yu and (b) midsummer period.

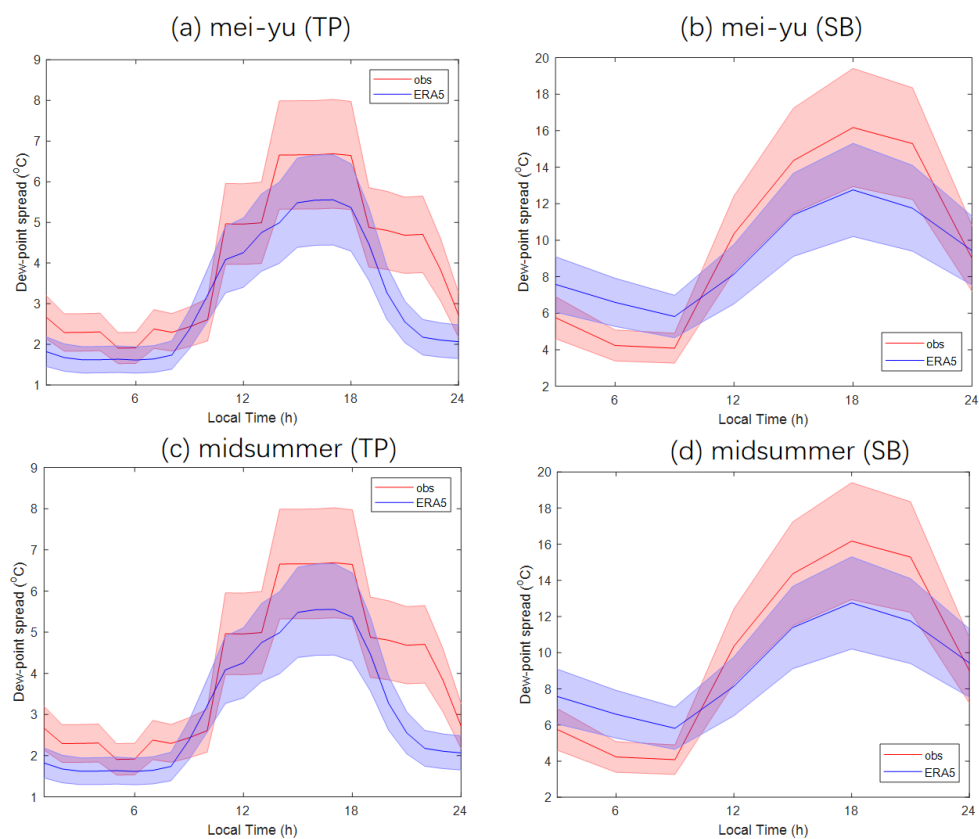

Figure S3: The comparison of dew point spread from the ERA5 dataset (blue line) and ground observations (red line) and their standard error (blue shaded area for ERA5 dataset, and red shaded area for observations) during the (a,b) mei-yu and (c,d) midsummer period over the (a,c) Tibetan Plateau and (b,d) Sichuan Basin.
